# Supplementary material
Source: PubMed Central journal article supplement (PMC10205698)
Supplement: NIHMS1886272-supplement-1.pdf [file NIHMS1886272-supplement-1.pdf]

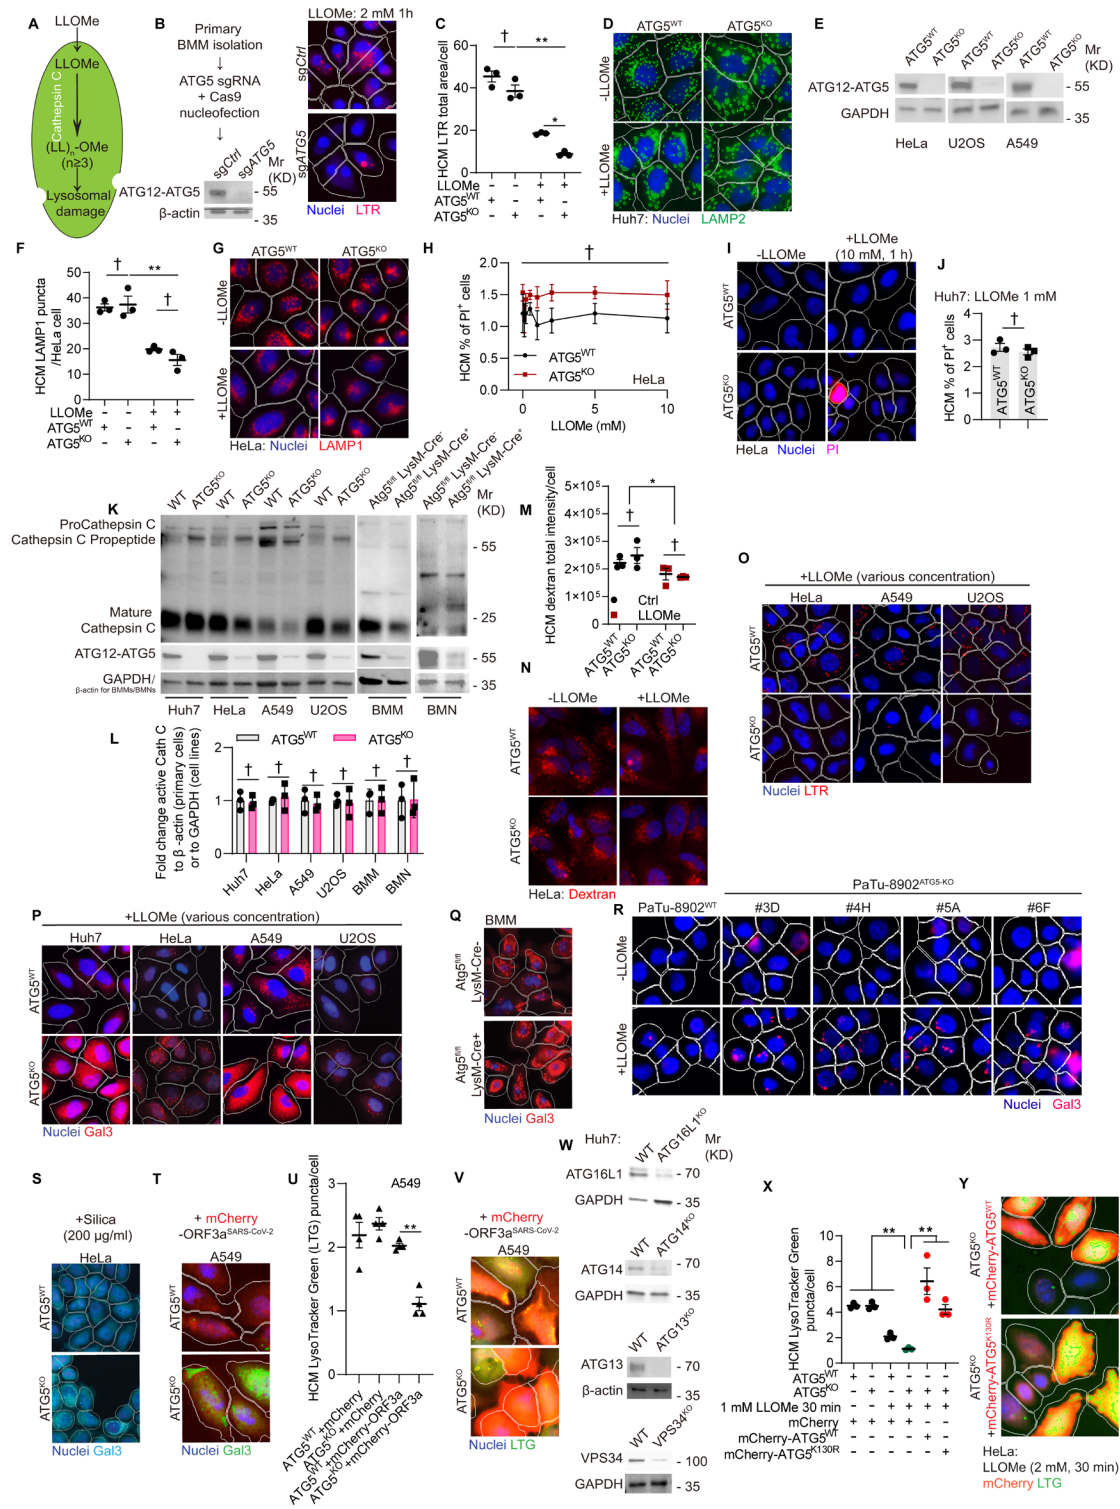

**Supplementary Figure 1. Loss of ATG5 but not of other ATGs renders lysosomes excessively susceptible to damage continued (related to Figure 1)**

**A**, Schematic for LLOMe mechanism. **B**, Schematic and immunoblot of CRISPR knockout of ATG5 in primary BMMs, and representative images of LTR puncta following 2 mM LLOMe incubation for 1 hour. **C**, HCM quantification of LTR area in Huh7<sup>ATG5-WT</sup> and Huh7<sup>ATG5-KO</sup> cells treated with or without 1 mM LLOMe for 30 min. Data, means ± SE (n=3); two-way ANOVA with Tukey's multiple comparisons. **D**,

Representative image of LAMP2 puncta in Huh7<sup>ATG5-WT</sup> and Huh7<sup>ATG5-KO</sup> cells treated with or without 1 mM LLOMe for 30 min. **E**, Immunoblot of ATG5 knockout in U2OS, HeLa, and A549 cells. **F**, HCM quantification and **G**, representative images of LAMP1 puncta in HeLa<sup>ATG5-WT</sup> and HeLa<sup>ATG5-KO</sup> cells treated with or without 2 mM LLOMe for 30 min. Data, means  $\pm$  SE (n=3); two-way ANOVA with Tukey's multiple comparisons. **H**, HCM quantification and **I**, representative images % PI<sup>+</sup> cells in HeLa<sup>ATG5-WT</sup> and HeLa<sup>ATG5-KO</sup> cells treated with indicated concentration of LLOMe for 1 h. Data, means  $\pm$  SE (n=3); two-way ANOVA with Tukey's multiple comparisons. **J**, HCM quantification of % PI<sup>+</sup> cells in Huh7<sup>ATG5-WT</sup> and Huh7<sup>ATG5-KO</sup> cells treated with 1 mM LLOMe for 1 h. Data, means  $\pm$  SE (n=3); unpaired *t*-test. **K**, Immunoblot and quantification (**L**) of Cathepsin C expression in ATG5<sup>WT</sup> and ATG5<sup>KO</sup> cells from indicated cell types. **M**, HCM quantification and representative images (**N**) of dextran TexasRed 3K intensity in HeLa<sup>ATG5-WT</sup> and HeLa<sup>ATG5-KO</sup> cells treated with or without 2 mM LLOMe for 30 min. Data, means  $\pm$  SE (n=3); two-way ANOVA with Tukey's multiple comparisons. **O**, Representative images of LTR puncta in ATG5<sup>WT</sup> and ATG5<sup>KO</sup> cells of indicated cell types treated with LLOMe for 30 min. **P**, Representative images of Gal3 puncta in ATG5<sup>WT</sup> and ATG5<sup>KO</sup> cells of indicated cell types treated with LLOMe for 30 min. **Q**, Representative images of Gal3 puncta in Atg5<sup>fl/fl</sup> LysM-Cre<sup>-</sup> and Atg5<sup>fl/fl</sup> LysM-Cre<sup>+</sup> BMMs treated with LLOMe for 30 min. **R**, Representative images of Gal3 puncta in PaTu-8902<sup>WT</sup> and PaTu-8902<sup>ATG5-KO</sup> cells treated with or without 1.5 mM LLOMe for 30 min. **S**, Representative images of Gal3 puncta in HeLa<sup>ATG5-WT</sup> and HeLa<sup>ATG5-KO</sup> cells treated with 200  $\mu$ g/mL silica crystals. **T**, Representative images of Gal3 puncta in A549<sup>ATG5-WT</sup> and A549<sup>ATG5-KO</sup> cells transfected with mCherry-ORF3a<sup>SARS-CoV-2</sup>. **U**, HCM quantification and representative images (**V**) of Gal3 puncta in A549<sup>ATG5-WT</sup> and A549<sup>ATG5-KO</sup> cells transfected with mCherry-ORF3a<sup>SARS-CoV-2</sup>. Data, means  $\pm$  SE (n=3); two-way ANOVA with Tukey's multiple comparisons. **W**, Immunoblot of CRISPR knockout of ATG16L1, ATG14, ATG13, and VPS34 in Huh7 cells. **X**, HCM quantification and **Y**, representative images of LysoTracker Green (LTG) puncta in HeLa<sup>ATG5-WT</sup> and HeLa<sup>ATG5-KO</sup> cells overexpressing or not overexpressing mCherry-ATG5<sup>WT</sup> or mCherry-ATG5<sup>K130R</sup> treated with or without 2 mM LLOMe for 30 min. Data, means  $\pm$  SE (n=3); unpaired *t*-test. In all HCM graphs, each individual data point represents independent biological replicate, with values based on 49-64 fields/well, >500 primary objects (cells) per well, 5 wells per sample (used only for sampling error) with bars denoting means for biological replicates and standard errors of the mean. Statistical significance symbols in all panels, †p $\geq$ 0.05, \*p<0.05, \*\*p<0.01.

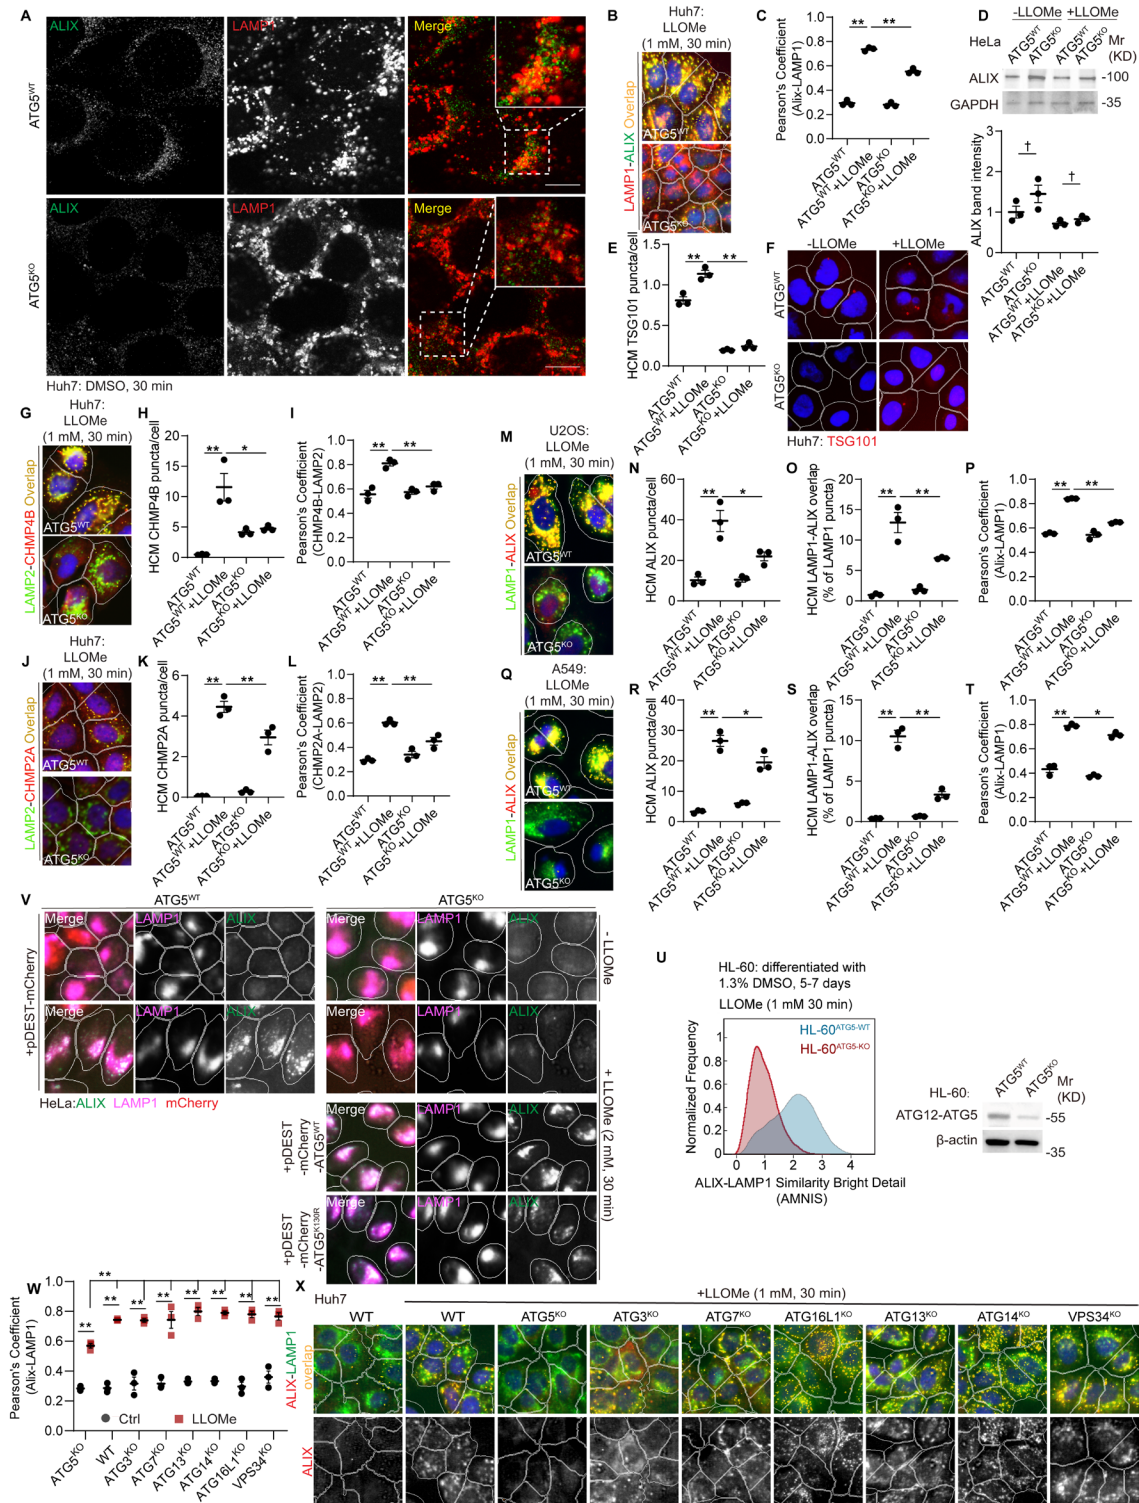

**Supplementary Figure 2. ATG5 is required for recruitment of ESCRTs to repair damaged lysosomes continued (related to Figure 2)**

**A**, Representative confocal images of ALIX and LAMP1 in Huh7<sup>ATG5<sup>WT</sup></sup> and Huh7<sup>ATG5<sup>KO</sup></sup> cells treated with DMSO for 30 min. Scale bars, 10  $\mu$ m. **B**, Representative HCM images of ALIX-LAMP1 overlap in Huh7<sup>ATG5<sup>WT</sup></sup> and Huh7<sup>ATG5<sup>KO</sup></sup> cells treated with 1 mM LLOMe for 30 min. **C**, HCM quantification of Pearson's coefficients of ALIX-LAMP1 in Huh7<sup>ATG5<sup>WT</sup></sup> and Huh7<sup>ATG5<sup>KO</sup></sup> cells treated with or without 1 mM LLOMe for

30 min. Data, means  $\pm$  SE (n=3); two-way ANOVA with Tukey's multiple comparisons. **D**, Representative immunoblot images and quantification of ALIX in HeLa<sup>WT</sup> and HeLa<sup>ATG5-KO</sup> cells treated with or without 2 mM LLOMe for 30 min. Data, means  $\pm$  SE (n=3); two-way ANOVA with Tukey's multiple comparisons. **E**, HCM quantification and **F**, representative images of TSG101 puncta in Huh7<sup>ATG5-WT</sup> and Huh7<sup>ATG5-KO</sup> cells treated with or without 1 mM LLOMe for 30 min. Data, means  $\pm$  SE (n=3); two-way ANOVA with Tukey's multiple comparisons. **G**, Representative images and HCM quantification of CHMP4B puncta (**H**) and Pearson's coefficients of LAMP2-CHMP4B (**I**) in Huh7<sup>ATG5-WT</sup> and Huh7<sup>ATG5-KO</sup> cells treated with or without 1 mM LLOMe for 30 min. Data, means  $\pm$  SE (n=3); two-way ANOVA with Tukey's multiple comparisons. **J**, Representative images and HCM quantification of CHMP2A puncta (**K**) and Pearson's coefficients of LAMP2-CHMP2A (**L**) in Huh7<sup>ATG5-WT</sup> and Huh7<sup>ATG5-KO</sup> cells treated with or without 1 mM LLOMe for 30 min. Data, means  $\pm$  SE (n=3); two-way ANOVA with Tukey's multiple comparisons. **M-P**, Representative images (**M**) and HCM quantification of ALIX puncta (**N**), LAMP1-ALIX overlap (**O**), and Pearson's coefficients of LAMP1-ALIX (**P**) in U2OS<sup>ATG5-WT</sup> and U2OS<sup>ATG5-KO</sup> cells treated with or without 1 mM LLOMe for 30 min. Data, means  $\pm$  SE (n=3); two-way ANOVA with Tukey's multiple comparisons. **Q**, Representative images and HCM quantification of ALIX puncta (**R**), LAMP1-ALIX overlap (**S**), and Pearson's coefficients of LAMP1-ALIX (**T**) in A549<sup>ATG5-WT</sup> and A549<sup>ATG5-KO</sup> cells treated with or without 1 mM LLOMe for 30 min. Data, means  $\pm$  SE (n=3); two-way ANOVA with Tukey's multiple comparisons. **U**, Representative images of ALIX-LAMP1 similarity bright detail (top) and immunoblot of ATG5 expression (bottom) in HL-60<sup>ATG5-WT</sup> and HL-60<sup>ATG5-KO</sup> cells incubated with 1 mM LLOMe for 30 min. **V**, Representative images of ALIX puncta and ALIX-LAMP1 overlap in HeLa<sup>ATG5-WT</sup> and HeLa<sup>ATG5-KO</sup> cells transfected with mCherry, mCherry-ATG5<sup>WT</sup>, or mCherry-ATG5<sup>K130R</sup> followed by incubation with or without 2 mM LLOMe for 30 min. **W**, Pearson's coefficients of LAMP1-ALIX and representative images (**X**) of ALIX puncta and ALIX-LAMP1 overlap in Huh7<sup>ATG5-WT</sup>, Huh7<sup>ATG5-KO</sup>, Huh7<sup>ATG3-KO</sup>, Huh7<sup>ATG7-KO</sup>, Huh7<sup>ATG13-KO</sup>, Huh7<sup>ATG14-KO</sup>, Huh7<sup>ATG16L1-KO</sup> and Huh7<sup>VPS34-KO</sup> cells incubation with 1 mM LLOMe for 30 min. Data, means  $\pm$  SE (n=3); two-way ANOVA with Tukey's multiple comparisons. In all HCM graphs, each individual data point represents an independent biological replicate, with values based on 49-64 fields/well, >500 primary objects (cells) per well, 5 wells per sample (used only for sampling error) with bars denoting means for biological replicates and standard errors of the mean. Statistical significance symbols in all panels, †p $\geq$ 0.05, \*p<0.05, \*\*p<0.01.

**ATG12-ATG5 Conjugation-dependent:**

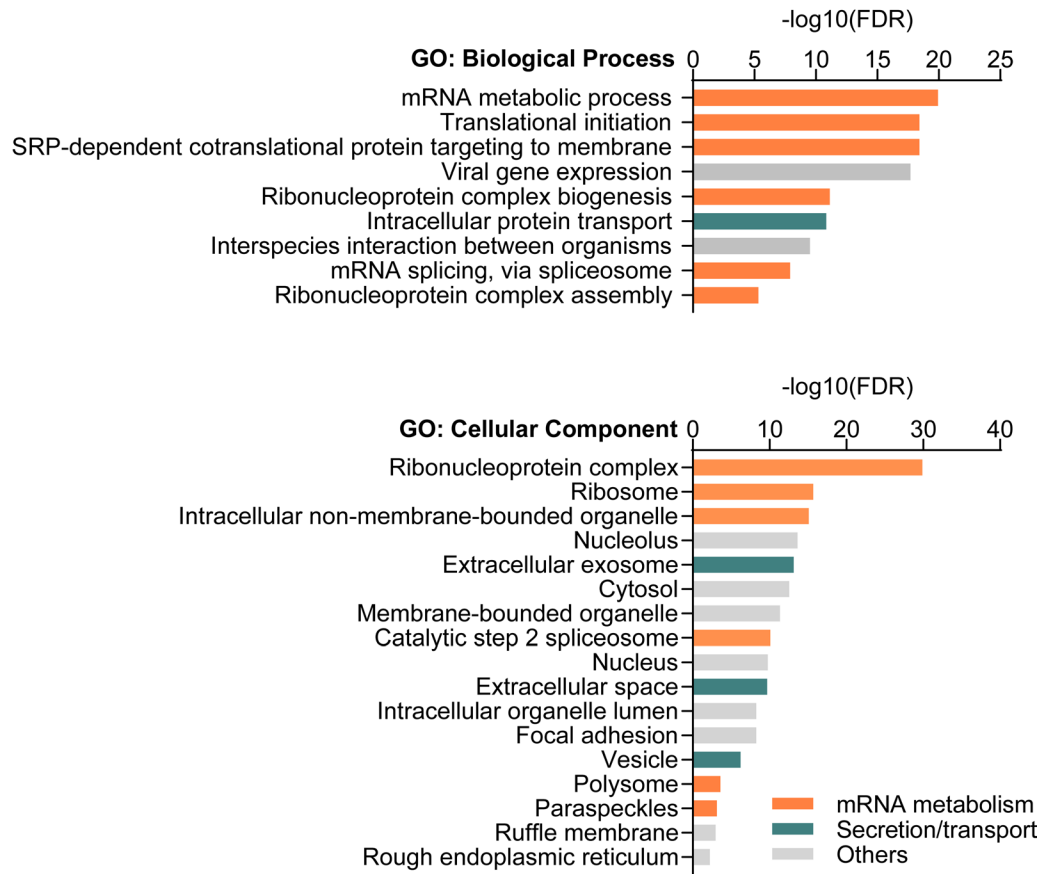

**Supplementary Figure 3. Proximity biotinylation proteomics of ATG5 interactors continued (related to Figure 3)**

Pathway enrichment analysis (cellular components and biological processes) of conjugation-dependent proteins.

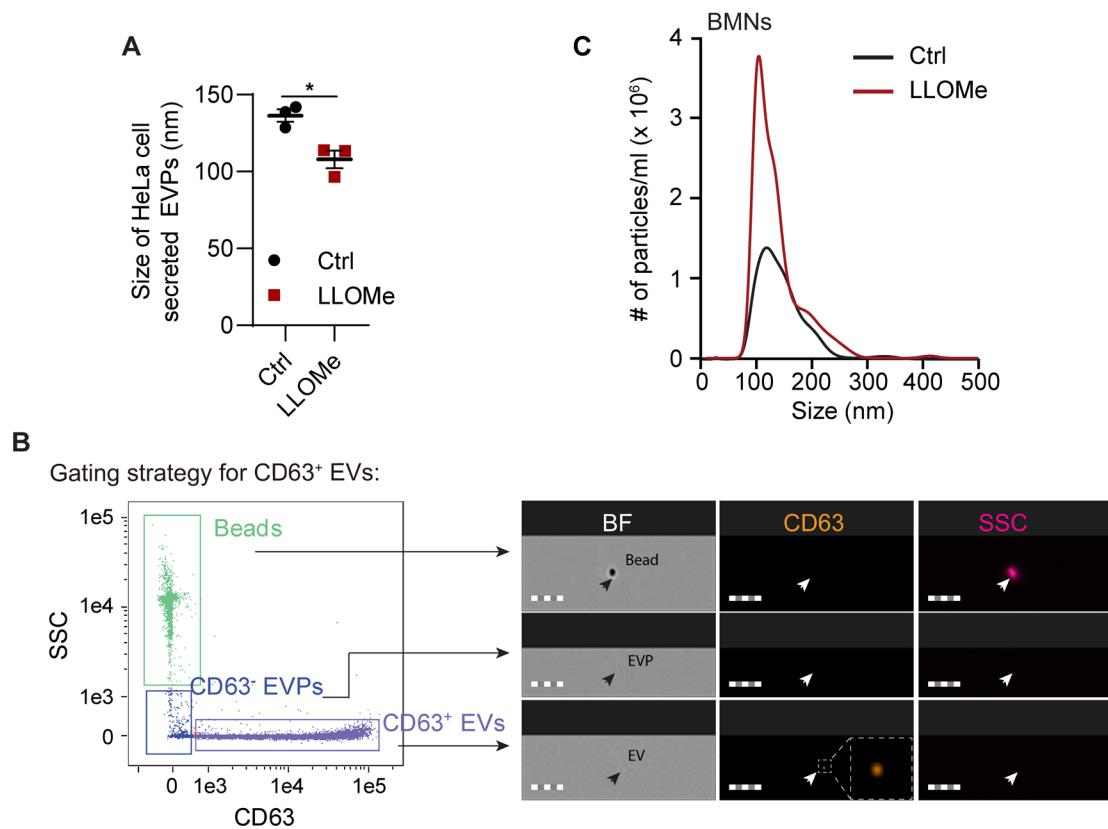

**Supplementary Figure 4. Lysosomal damage induces extracellular vesicle release and neutrophil degranulation continued (related to Figure 4)**

**A**, Quantification of the size of EVPs extracted from supernatant of HeLa cells treated with or without 2 mM LLOMe for 1 h using NTA. Data, means  $\pm$  SE (n=3); unpaired *t*-test. Each individual data point represents independent biological replicate. **B**, Gating strategy for CD63<sup>+</sup> EVs using AMNIS. Scale bars, 10  $\mu$ m. **C**, Representative image of concentration and size distribution of EVPs extracted from supernatant of BMNs treated with 1 mM LLOMe for 1 h using NTA. Statistical significance symbols in all panels, †p $\geq$ 0.05, \*p<0.05, \*\*p<0.01.

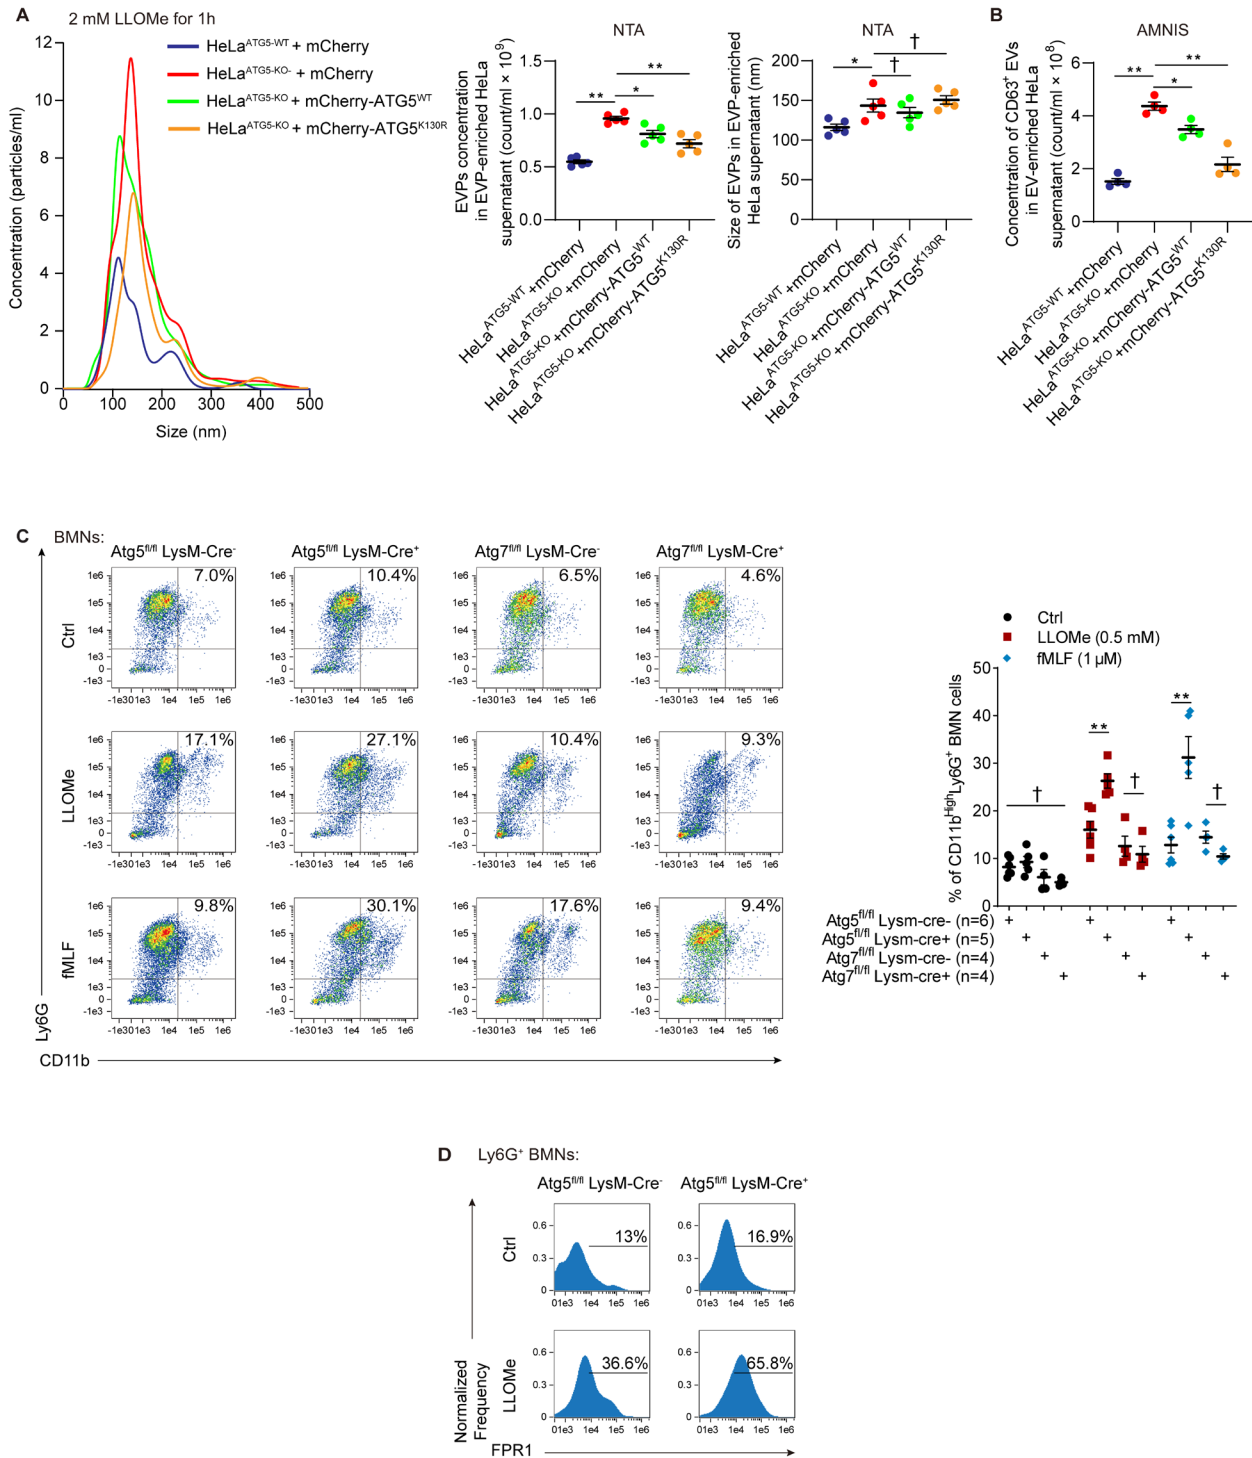

**Supplementary Figure 5. ATG5 knockout enhances EV release in HeLa cells whereas in PMNs loss of ATG5 promotes degranulation in response to lysosomal damage (related to Figures 5 and 6).**

**A**, Representative flow cytometry and quantifications of % CD11b<sup>High</sup>Ly6G<sup>+</sup> BMNs from Atg5<sup>fl/fl</sup> LysM-Cre<sup>-</sup> and Atg5<sup>fl/fl</sup> LysM-Cre<sup>+</sup>, Atg7<sup>fl/fl</sup> LysM-Cre<sup>-</sup> and Atg7<sup>fl/fl</sup> LysM-Cre<sup>+</sup> mice incubated with or without 0.5 mM LLOMe for 30 min. Data, means  $\pm$  SE (n=4-6); two-way ANOVA with Tukey's multiple comparisons. **B**, Representative flow cytometry of FPR1 on Atg5<sup>fl/fl</sup> LysM-Cre<sup>-</sup> and Atg5<sup>fl/fl</sup> LysM-Cre<sup>+</sup> BMNs incubated with

or without 0.5 mM LLOMe for 30 min. In all panels, each data point represents an independent biological replicate. **C**, Representative graph of concentration, size distribution and quantification (NTA) of EVPs of HeLa<sup>ATG5-WT</sup> and HeLa<sup>ATG5-KO</sup> cells transfected with mCherry, mCherry-ATG5<sup>WT</sup>, mCherry-ATG5<sup>K130R</sup> incubated with 2 mM LLOMe for 1 h. Data, means  $\pm$  SE (n=5); one-way ANOVA with Tukey's multiple comparisons. **D**, Flow cytometry quantification of CD63<sup>+</sup> EVs extracted from supernatant of HeLa<sup>ATG5-WT</sup> and HeLa<sup>ATG5-KO</sup> cells transfected with mCherry, mCherry-ATG5<sup>WT</sup>, mCherry-ATG5<sup>K130R</sup> and incubated with 2 mM LLOMe for 1 h. Data, means  $\pm$  SE (n=5); one-way ANOVA with Tukey's multiple comparisons. In all panels, each data point represents an independent biological replicate. Statistical significance symbols in all panels, †p $\geq$ 0.05, \*p<0.05, \*\*p<0.01.



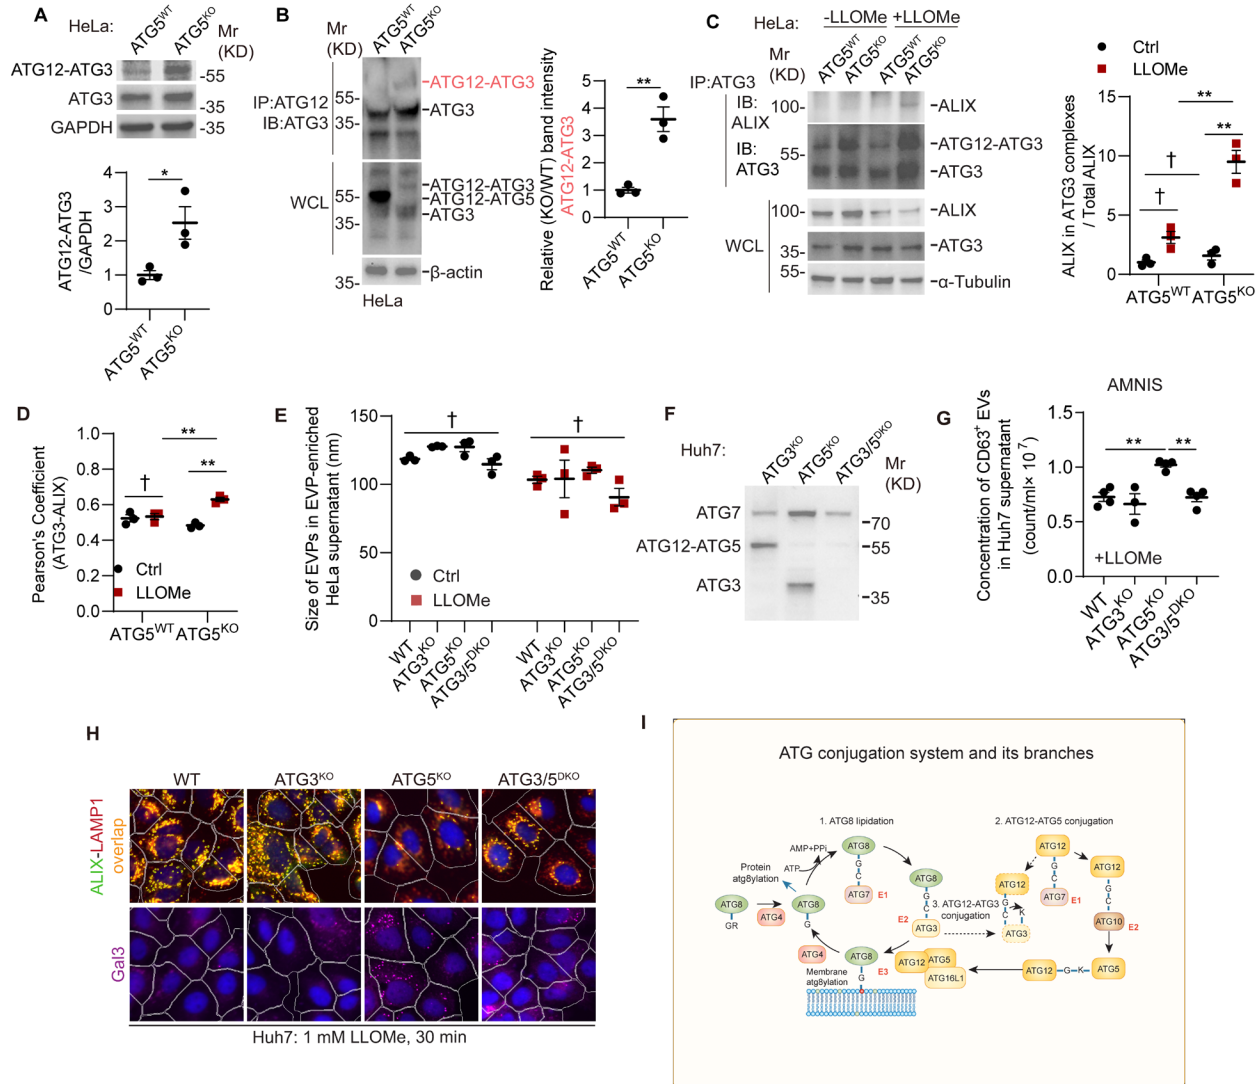

**Supplementary Figure 6. Alternative conjugation contributes to lysosomal vulnerability and exocytic processes continued (related to Figure 7)**

**A**, Immunoblot and quantifications of ATG12-ATG3 conjugate in HeLa<sup>ATG5-WT</sup> and HeLa<sup>ATG5-KO</sup> cells. Data, means  $\pm$  SE (n=3); unpaired *t*-test. **B**, Co-IP analysis of ATG12-ATG3 conjugate identity and quantification in HeLa<sup>ATG5-WT</sup> and HeLa<sup>ATG5-KO</sup> cells. Data, means  $\pm$  SE (n=3); unpaired *t*-test. **C**, Co-IP analysis and quantifications of ALIX and ATG12-ATG3 interactions in HeLa<sup>ATG5-WT</sup> and HeLa<sup>ATG5-KO</sup> cells treated with or without 2 mM LLOMe for 30 min. Data, means  $\pm$  SE (n=3); two-way ANOVA with Tukey's multiple comparisons. **D**, Pearson's coefficients of ALIX-ATG3 in Huh7<sup>ATG5-WT</sup> and Huh7<sup>ATG5-KO</sup> cells treated with or without 1 mM LLOMe for 30 min. Data, means  $\pm$  SE (n=3); two-way ANOVA with Tukey's multiple comparisons. **E**, Quantification (NTA) of EV sizes extracted from supernatant of HeLa<sup>WT</sup>, HeLa<sup>ATG3-KO</sup>, HeLa<sup>ATG5-KO</sup>, and HeLa<sup>ATG3/5-DKO</sup> cells treated with or without 2 mM LLOMe for 30 min. Data, means  $\pm$  SE (n=3); two-way ANOVA with Tukey's multiple comparisons. **F**, Immunoblot of Huh7<sup>ATG3-KO</sup>, Huh7<sup>ATG5-KO</sup>, and Huh7<sup>ATG3/5-DKO</sup> cells. **G**, Flow cytometry quantification of CD63<sup>+</sup> EVs extracted from supernatant of Huh7<sup>WT</sup>, Huh7<sup>ATG3-KO</sup>, Huh7<sup>ATG5-KO</sup>, and Huh7<sup>ATG3/5-DKO</sup> cells treated with 1 mM LLOMe for 1 h. Data, means  $\pm$  SE (n $\geq$ 3); one-way ANOVA with Tukey's multiple comparisons. **H**, Representative images of ALIX-LAMP1 overlap area (top panel) and Gal3 puncta (bottom panel) in Huh7<sup>WT</sup>, Huh7<sup>ATG3-KO</sup>, Huh7<sup>ATG5-KO</sup>, and Huh7<sup>ATG3/5-DKO</sup> cells treated with 1 mM LLOMe for 30 min. **I**, The branches of ATG conjugation are modified from (Deretic and Lazarou, 2022). In all panels, each data point represents independent biological replicate. Statistical significance symbols in all panels, † $\geq$ 0.05, \* $p$ <0.05, \*\* $p$ <0.01.
